# Supplementary material for: Family Communication Status and Influencing Factors Among Advanced Cancer Patients: A Cross- Sectional Study
Source: Research Square preprint supplement (doi:10.21203/rs.3.rs-7433559/v1), 2025-09-29
Supplement: Supplementary file 1 [file 4dba973673af32ffac00e42b.docx]

STROBE Statement—Checklist of items that should be included in reports of ***cross-sectional studies***

|  | Item No | Recommendation | Page No |
| --- | --- | --- | --- |
| **Title and abstract** | 1 | (*a*) Family Communication Status and Influencing Factors Among Advanced Cancer Patients: A Cross-Sectional Study | 1 |
| (*b*) To investigate the current status of family communication among advanced cancer patients and their caregivers, and identify key influencing factors | 1 |
| Introduction | | | |
|  | 2 | Advanced cancer represents a critical global public health burden, with escalating incidence and mortality rates worldwide〔1〕. According to 2020 data released by the International Agency for Research on Cancer (IARC), approximately 19.3 million new cancer cases and nearly 10 million cancer-related deaths occurred globally〔2,3〕, Of these global cases, China accounted for nearly 23.7%〔4〕. Moreover, IARC data indicate that China bears a disproportionately high burden of cancer, where a significant majority of patients are diagnosed at advanced stages〔5〕. Advanced cancer has evolved into a chronic condition necessitating long-term management and sustained ambulatory care. Patients with advanced disease face multifaceted challenges—including physical deterioration, treatment-related toxicities, economic hardship, and psychological distress—which collectively underscore the critical need to enhance quality of life during the terminal phase〔6〕. Therefore, constant interaction between patients and caregiver is becoming increasingly important, and the role of the caregiver is becoming crucial for optimal cancer care. Strong communication between patient and caregiver is vital for the success of this relationship〔7〕.Effective family communication has emerged as a cornerstone in addressing these challenges, as it facilitates emotional support, decision-making, and symptom management among patients and their caregivers〔8〕. However, empirical evidence indicates that family communication often remains suboptimal in advanced cancer care within China, contributing to heightened anxiety, depressive symptoms, and relational strain among patients and caregivers〔9〕. Furthermore, current research in China primarily focuses on communication dynamics between cancer patients and their spouses. Although the existing Family Avoidance of Communication About Cancer (FACC) scale evaluates communication patterns, it predominantly assesses the degree of openness versus avoidance within family discourse, Notably, the FACC scale does not evaluate communication congruence or content specificity between advanced-stage cancer patients and their family caregivers〔10〕. In contrast, the Cancer Communication Assessment Tool for Patients and Families (CCAT-PF) scale—internationally validated for its ability to characterize the unique dyadic communication patterns between cancer patients and their caregivers—has not yet been applied within the Chinese context. International studies have consistently validated the psychometric properties of the Family Communication Scale (CCAT-PF). Specifically, scholars Siminoff〔11〕 et al (U.S). demonstrated its validity and specificity through a psychometric evaluation involving 190 patient-caregiver dyads. Similarly, a large-scale study by Korean researchers Dong〔12〕 et al*.* confirmed high internal consistency reliability (Cronbach’s α >0.90) in a cohort of 990 cancer patients, Further supporting these findings, German investigators Natasha〔13〕 et al. replicated the scale’s structural validity and internal consistency in 189 dyads, reinforcing its cross-cultural applicability. Consequently, this study aimed to: (1) validate the cultural adaptability and psychometric properties of the CCAT-PF scale within China, (2) examine the current state of family communication among advanced cancer patients and their caregivers, and (3) analyze key influencing factors. The findings are expected to provide a theoretical basis for developing individualized family communication practice programs aimed at enhancing the quality of life for families facing advanced cancer. | 2 |
| Methods | | | |
| Study design | 3 | A cross-sectional study.(Sept 2024–June 2025). | 3 |
| Setting | 4 | Sample size calculation followed statistical guidelines for logistic regression analysis, recommending a minimum of 102-204 participants considering 17 predictor variables and a 20% non-response rate〔12〕. This yielded a target range of 102-204 patient-caregiver dyads. A total of 210 dyads were initially approached. After excluding 10 dyads due to incomplete questionnaires, 200 dyads with recurrent tumors were enrolled, meeting the sample size requirement and resulting in a response rate of 95.24%. | 4 |
| Participants | 5 | This cross-sectional study, conducted between September 2024 and June 2025, investigated family communication patterns among advanced cancer patient-caregiver dyads in China. Participants were recruited using a convenience sampling method from two tertiary-level general hospitals in Anhui Province, targeting individuals meeting specific inclusion criteria: (1) Patients Inclusion Criteria: ①Age ≥18 years; ②Diagnosed with cancer at stage III or IV (according to American Joint Committee on Cancer staging system)〔14〕; ③Clinician-estimated life expectancy of 3–6 months, determined using validated prognostic tools; ④Ability to provide written informed consent and sufficient cognitive capacity to independently complete self-report questionnaires.  independently. (2) Caregiver inclusion criteria: ①Age ≥18 years; ②Identified by the patient as the primary unpaid caregiver; ③ Provision of ongoing care and support at home and during hospitalizations. Exclusion Criteria (applied to both patients and caregivers): The exclusion criteria for this study are patients and their caregivers with mental illness, cognitive impairment, or other serious medical conditions. | 5 |
| Variables | 6 | A self-report questionnaire designed based on literature review and clinical expertise, capturing Patient and caregivers-specific variables included age, gender, religious beliefs, residence, marital status, education level, monthly income, healthcare insurance, course, modalities of treatment, employment status, CCI〔16〕, comorbid medical conditions, relationship with patient（caregiver）, living with patient（caregiver）,The Chinese version of Cancer Communication Assessment Tool for Patients and Families (CCAT-PF),The Adaptation Partnership Growth Affection and Resolve (APGAR),Fear of progression questionnaire-short form (FoP-Q-SF) and Fear of progression questionnaire for caregiver (FoP-Q-SF /C)  , Social isolation assessment questionnaire for cancer patients (SIAQ-CF),Caregiver Burden Scale for Cancer Patients (CBS-CP), | 6 |
| Data sources/ measurement | 7* | This study employed a dual-mode approach for data collection: in-person distribution of paper questionnaires and online distribution via scannable QR codes for electronic versions. Trained investigators, having undergone systematic training, distributed paper questionnaires to eligible participants and provided personal guidance to ensure accurate and complete responses. For participants with lower education levels or visual impairments, investigators verbally administered the questionnaire. All questionnaires were collected on-site and checked for completeness; any missing items were promptly supplemented. A total of 210 questionnaires were distributed, with 200 valid questionnaires recovered, yielding a valid response rate of 95.24%. | *7* |
| Bias | 8 | The study's purpose was explained to three investigators who had undergone training, and a standardised questionnaire was used to ensure consistency. (1) Sociodemographic and other data were collected by the investigators on the day of the patient's hospital admission through the questionnaire with one-on-one guidance. For those who had difficulty completing the questionnaire, the investigator. (2) Clinical disease data and laboratory indicators were collected from hospital medical records. Data sets with > 10% missing information were excluded from the study. | 8 |
| Statistical methods | 9 | Statistical analyses were performed using SPSS software version 27.0 for data entry and processing. Continuous data were described as, while categorical data were presented as 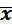± s frequencies and percentages. Univariate analyses included the Chi-square test for group comparisons, independent samples t-tests for normally distributed continuous variables, and Mann-Whitney U tests for non-normally distributed variables. Spearman’s rank correlation was employed to assess relationships between variables. Predictors demonstrating statistical significance in univariate analyses were subsequently incorporated into a logistic regression model to identify independent influencing factors. A P-value < 0.05 was considered statistically significant. | 9 |
| Results | | | |
| Main results | 10 | (*a*) This study enrolled 200 patients with advanced cancer and 200 corresponding family caregivers. Among the patients, 107 (54.9 %) were male and 93 (45.1 %) were female; their mean CCAT-P score Score was 59.18 ± 20.12 among the advanced cancer patients and 58.23±18.32 among the caregivers respectively, 76 (38.0 %) were male and 124 (62.0 %) were female, with a mean CCAT-P score of 57.34 ± 18.56.Univariate analyses showed that, within the patient group, age, marital status, educational level, monthly household income, employment status, presence of comorbid medical conditions, Charlson Comorbidity Index (CCI), and living with the caregiver were significantly associated with the family communication score (P < 0.05). In the caregiver group, marital status, educational level, monthly household income, employment status, presence of comorbid medical conditions, and living with the patient were likewise significantly associated | 10 |
| (*b*) Spearman correlation analyses revealed that, among patients with advanced cancer, Family APGAR scores were inversely correlated with family communication scores (P < 0.05), whereas both Fear of Progression Questionnaire–Short Form (FoP-Q-SF) and Self-Identity After Cancer—Couple/Family (SIAQ-CF) scores showed positive correlations with family communication scores (P < 0.05).Among family caregivers, Family APGAR scores were likewise negatively associated with family communication scores (P < 0.05), while FoP-Q-SF and Caregiver Burden Scale—Cancer Patient (CBS-CP) scores were positively correlated with family communication scores (P < 0.05). |  |
| (*c*)Variables that exhibited statistical significance in the univariate analyses were entered into the logistic regression model. The results indicated that educational level, per-capita monthly household income, family function, fear of disease progression, and social alienation of patients with advanced cancer were independent determinants of family communication among patients. For family caregivers, educational level, per-capita monthly household income, family function, fear of disease progression, and caregiver burden were independently associated with family communication. |  |
| Discussion | | | |
| Key results | 11 | Our findings reveal that family communication barriers among advanced cancer patients are markedly higher than those reported in Western studies (mean CCAT-P score: 59.18 ± 20.12; CCAT-F score: 58.23 ± 18.32), highlighting the profound impact of cultural norms on communication patterns.We identify six modifiable risk factors (education level, monthly income, [APGAR], [FoP-Q-SF/FoP-Q-SF/C], [SIAQ-CF], and [CBS-CP]) that significantly impede family communication (*P* < 0.05) | 12 |
| Limitations | 12 | Notably, this study employed a cross-sectional design with samples drawn from two tertiary hospitals in Anhui Province, China, imposing certain limitations concerning temporal scope and population representativeness. Future research necessitates multicenter, large-sample longitudinal studies to track the dynamic trajectory of family communication quality over time. Additionally, as the current analysis relied solely on separate surveys administered to cancer patients and their primary family caregivers using the Cancer Family Communication Assessment Tool (CCAT-P), it may underestimate intra-family communication congruence. Subsequent studies incorporating dual-subject data collection are recommended to refine the analytical framework elucidating influencing factors. This enhanced understanding will provide a robust evidence base for developing targeted interventions to improve family communication and, ultimately, enhance the quality of life for families navigating advanced cancer. | 12 |
| Other information | | | |
| Funding | 13 | This study was supported by a grant (No. 2021kcszsfkc433) from the Fund Project of Nursing Laboratory Science Provincial Curriculum Civics Demonstration Course, the Anhui Education Department. and（KY22040046）2022 Provincial Department of Education Key Projects in Natural Science. | 13 |

*Give information separately for exposed and unexposed groups.

**Note:** An Explanation and Elaboration article discusses each checklist item and gives methodological background and published examples of transparent reporting. The STROBE checklist is best used in conjunction with this article (freely available on the Web sites of PLoS Medicine at http://www.plosmedicine.org/, Annals of Internal Medicine at http://www.annals.org/, and Epidemiology at http://www.epidem.com/). Information on the STROBE Initiative is available at www.strobe-statement.org.
